# Supplementary material for: Relationship between Individual External Doses, Ambient Dose Rates and Individuals’ Activity-Patterns in Affected Areas in Fukushima following the Fukushima Daiichi Nuclear Power Plant Accident
Source: PLoS One. 2016 Aug 5;11(8):e0158879. doi: 10.1371/journal.pone.0158879 (PMC4975410; doi:10.1371/journal.pone.0158879)
Supplement: S3 Table — Individual external dose data, making it possible to locate position and relate the ambient dose data, were provided. (XLSX) [file pone.0158879.s003.xlsx]

## Sheet: S3Table
Hourly individual external dose obtained by D-shuttle, the corresponding airborne-based ambient dose rate and information on location/activity for study participants
Subject No.	Individual External Dose [μSv/h]	Ambient Dose Rate [μSv/h]	Location/Activity
1	0.15	0.292633	Home
1	0.12	0.416602	Other
1	0.02	0.505477	Indoor (except home)
1	0.06	0.496819	Indoor (except home)
1	0.13	0.496819	Other
1	0.07	0.496819	Indoor (except home)
1	0.06	0.496819	Indoor (except home)
1	0.1	0.459777	Indoor (except home)
1	0.09	0.280578	Other
1	0.07	0.287998	Home
1	0.09	0.28835	Home
1	0.11	0.292526	Home
1	0.12	0.297046	Home
1	0.13	0.297046	Home
1	0.19	0.297046	Home
1	0.04	0.297046	Home
1	0.01	0.297046	Home
1	0.08	0.297046	Home
1	0.09	0.292526	Home
1	0.05	0.290249	Home
1	0.08	0.288539	Home
1	0.15	0.297046	Home
1	0.07	0.297046	Home
1	0.1	0.336356	Home
1	0.34	0.577005	Transport
1	0.16	0.560658	Transport
1	0.18	0.524876	Transport
1	0.25	0.515472	Transport
1	0.19	0.546589	Transport
1	0.02	0.497948	Other
1	0.1	0.496819	Indoor (except home)
1	0.13	0.451944	Indoor (except home)
1	0.12	0.309708	Other
1	0.14	0.289243	Home
1	0.12	0.288006	Home
1	0.09	0.288669	Home
1	0.1	0.288244	Home
1	0.1	0.293213	Home
1	0.11	0.297046	Home
1	0.09	0.297046	Home
1	0.11	0.297046	Home
1	0.09	0.297046	Home
1	0.16	0.288063	Home
1	0.04	0.29858	Other
1	0.15	0.300073	Other
1	0.16	0.287924	Home
1	0.1	0.292856	Outdoor
1	0.15	0.287061	Outdoor
1	0.09	0.282638	Outdoor
1	0.09	0.288232	Outdoor
1	0.12	0.285342	Outdoor
1	0.2	0.286287	Outdoor
1	0.1	0.291352	Outdoor
1	0.14	0.290301	Outdoor
1	0.41	0.368979	Transport
1	0.11	0.288974	Transport
1	0.08	0.288277	Home
1	0.1	0.287379	Home
1	0.09	0.292526	Home
1	0.11	0.288117	Home
1	0.11	0.297046	Home
1	0.07	0.297046	Home
1	0.05	0.297046	Home
1	0.09	0.297046	Home
1	0.11	0.297046	Home
1	0.02	0.297046	Home
1	0.08	0.294267	Home
1	0.13	0.289556	Home
1	0.11	0.383163	Other
1	0.04	0.496819	Indoor (except home)
1	0.06	0.496819	Indoor (except home)
1	0.02	0.496819	Indoor (except home)
1	0.07	0.496819	Indoor (except home)
1	0.06	0.496819	Indoor (except home)
1	0.23	0.580804	Transport
1	0.26	0.543807	Transport
1	0.13	0.564206	Transport
1	0.02	0.499876	Indoor (except home)
1	0.13	0.479465	Indoor (except home)
1	0.11	0.42721	Transport
1	0.05	0.298391	Home
1	0.1	0.288253	Home
1	0.04	0.288996	Home
1	0.08	0.292554	Home
1	0.04	0.297046	Home
1	0.12	0.297046	Home
1	0.18	0.297046	Home
1	0.09	0.297046	Home
1	0.08	0.297046	Home
1	0.09	0.297046	Home
1	0.08	0.297046	Home
1	0.15	0.288006	Home
1	0.12	0.288693	Home
1	0.18	0.323535	Transport
1	0.25	0.293996	Outdoor
1	0.29	0.28643	Outdoor
1	0.18	0.291125	Outdoor
1	0.13	0.297046	Home
1	0.08	0.291734	Other
1	0.2	0.284885	Outdoor
1	0.2	0.280692	Outdoor
1	0.08	0.288376	Other
1	0.16	0.352387	Transport
1	0.15	0.34329	Other
1	0.12	0.295351	Home
1	0.1	0.297046	Home
1	0.11	0.297046	Home
1	0.08	0.297046	Home
1	0.11	0.297046	Home
1	0.09	0.297046	Home
1	0.09	0.297046	Home
1	0.08	0.297046	Home
1	0.22	0.297046	Home
1	0.11	0.297046	Home
1	0.14	0.297046	Home
1	0.09	0.297046	Home
1	0.11	0.294072	Home
1	0.11	0.292856	Home
1	0.17	0.28358	Outdoor
1	0.18	0.28338	Outdoor
1	0.1	0.283486	Outdoor
1	0.09	0.286265	Other
1	0.13	0.287584	Other
1	0.11	0.287101	Outdoor
1	0.09	0.285234	Outdoor
1	0.12	0.283176	Other
1	0.06	0.297046	Home
1	0.12	0.297046	Transport
1	0.16	0.297046	Home
1	0.1	0.297046	Home
1	0.07	0.297046	Home
1	0.07	0.297046	Home
1	0.14	0.297046	Home
1	0.2	0.297046	Home
1	0.13	0.297046	Home
1	0.12	0.297046	Home
1	0.13	0.297046	Home
1	0.13	0.297046	Home
1	0.07	0.297046	Home
1	0.09	0.297046	Home
1	0.13	0.297046	Home
1	0.12	0.297046	Home
1	0.14	0.292856	Outdoor
1	0.14	0.292856	Outdoor
1	0.12	0.292856	Outdoor
1	0.18	0.297046	Home
1	0.09	0.287201	Other
1	0.09	0.288101	Outdoor
1	0.19	0.288955	Outdoor
1	0.09	0.292441	Home
1	0.14	0.289472	Home
1	0.09	0.297046	Home
1	0.17	0.292554	Home
1	0.14	0.297046	Home
1	0.09	0.297046	Home
1	0.06	0.297046	Home
1	0.15	0.297046	Home
1	0.09	0.297046	Home
1	0.17	0.297046	Home
1	0.16	0.297046	Home
1	0.15	0.297046	Home
1	0.08	0.297046	Home
1	0.18	0.295697	Home
1	0.13	0.291416	Home
1	0.06	0.366054	Other
1	0.04	0.499876	Indoor (except home)
1	0.04	0.496819	Indoor (except home)
1	0.07	0.496819	Indoor (except home)
1	0.02	0.496819	Indoor (except home)
1	0.08	0.496819	Indoor (except home)
1	0.09	0.496819	Indoor (except home)
1	0.04	0.496819	Indoor (except home)
1	0.09	0.496819	Indoor (except home)
1	0.12	0.496819	Indoor (except home)
1	0.1	0.496819	Indoor (except home)
1	0.05	0.496819	Indoor (except home)
2	0.06	0.517612	Home
2	0.19	0.517612	Home
2	0.1	0.483664	Other
2	0.22	0.3658	Other
2	0.21	0.329418	Outdoor
2	0.21	0.480623	Outdoor
2	0.06	0.500818	Indoor (except home)
2	0.28	0.497998	Other
2	0.36	0.768599	Outdoor
2	0.25	0.470384	Other
2	0.1	0.522215	Other
2	0.06	0.517612	Home
2	0.08	0.517612	Home
2	0.1	0.517612	Home
2	0.09	0.517612	Home
2	0.08	0.517612	Home
2	0.1	0.517612	Home
2	0.14	0.517612	Home
2	0.1	0.517612	Home
2	0.1	0.517612	Home
2	0.05	0.517612	Home
2	0.08	0.517612	Home
2	0.09	0.517612	Home
2	0.13	0.517612	Home
2	0.15	0.517612	Home
2	0.17	0.477415	Other
2	0.14	0.472378	Other
2	0.21	0.505445	Outdoor
2	0.4	0.433257	Outdoor
2	0.47	0.502123	Indoor (except home)
2	0.1	0.389841	Other
2	0.26	0.445223	Outdoor
2	0.3	0.421643	Outdoor
2	0.19	0.454658	Other
2	0.13	0.521763	Other
2	0.16	0.517612	Home
2	0.12	0.517612	Home
2	0.09	0.517612	Home
2	0.07	0.517612	Home
2	0.08	0.517612	Home
2	0.14	0.517612	Home
2	0.06	0.517612	Home
2	0.05	0.517612	Home
2	0.07	0.517612	Home
2	0.09	0.517612	Home
2	0.16	0.517612	Home
2	0.09	0.517612	Home
2	0.1	0.517612	Home
2	0.13	0.517612	Home
2	0.1	0.517612	Home
2	0.06	0.517612	Home
2	0.07	0.517612	Home
2	0.08	0.517612	Home
2	0.08	0.411273	Indoor (except home)
2	0.09	0.411273	Indoor (except home)
2	0.09	0.411273	Indoor (except home)
2	0.04	0.411273	Indoor (except home)
2	0.13	0.411273	Indoor (except home)
2	0.06	0.411273	Indoor (except home)
2	0.09	0.411273	Indoor (except home)
2	0.14	0.411273	Indoor (except home)
2	0.18	0.491027	Other
2	0.14	0.517612	Home
2	0.09	0.517612	Home
2	0.07	0.517612	Home
2	0.15	0.517612	Home
2	0.13	0.517612	Home
2	0.05	0.517612	Home
2	0.1	0.517612	Home
2	0.12	0.517612	Home
2	0.07	0.517612	Home
2	0.15	0.517612	Home
2	0.1	0.517612	Home
2	0.05	0.517612	Home
2	0.17	0.517612	Home
2	0.14	0.517612	Home
2	0.15	0.517612	Home
2	0.06	0.517612	Home
2	0.08	0.517612	Home
2	0.15	0.517612	Home
2	0.09	0.517612	Home
2	0.07	0.517612	Home
2	0.15	0.517612	Home
2	0.08	0.517612	Home
2	0.08	0.517612	Home
2	0.08	0.517612	Home
2	0.09	0.517612	Home
2	0.09	0.517612	Home
2	0.05	0.517612	Home
2	0.09	0.517612	Home
2	0.12	0.517612	Home
2	0.09	0.517612	Home
2	0.08	0.517612	Home
2	0.13	0.517612	Home
2	0.07	0.517612	Home
2	0.07	0.517612	Home
2	0.1	0.517612	Home
2	0.04	0.517612	Home
2	0.1	0.517612	Home
2	0.14	0.517612	Home
2	0.13	0.517612	Home
2	0.15	0.517612	Home
2	0.08	0.517612	Home
2	0.1	0.517612	Home
2	0.15	0.517612	Home
2	0.13	0.517612	Home
2	0.09	0.517612	Home
2	0.09	0.517612	Home
2	0.17	0.517612	Home
2	0.15	0.517612	Home
2	0.1	0.517612	Home
2	0.13	0.517612	Home
2	0.15	0.517612	Home
2	0.09	0.517612	Home
2	0.14	0.517612	Home
2	0.13	0.517612	Home
2	0.06	0.517612	Home
2	0.12	0.517612	Home
2	0.06	0.517612	Home
2	0.12	0.522776	Home
2	0.08	0.515515	Other
2	0.14	0.4326	Other
2	0.22	0.512211	Outdoor
2	0.19	0.455954	Outdoor
2	0.23	0.500884	Indoor (except home)
2	0.25	0.447621	Other
2	0.74	0.491796	Outdoor
2	0.22	0.482047	Outdoor
2	0.2	0.47108	Outdoor
2	0.18	0.437623	Other
2	0.21	0.495958	Home
2	0.3	0.517612	Home
2	0.42	0.517612	Home
2	0.39	0.517612	Home
2	0.35	0.517612	Home
2	0.4	0.517612	Home
2	0.34	0.517612	Home
2	0.39	0.517612	Home
2	0.31	0.517612	Home
2	0.29	0.517612	Home
2	0.32	0.517612	Home
2	0.38	0.517612	Home
2	0.3	0.517612	Home
2	0.25	0.499023	Home
2	0.05	0.516827	Other
2	0.04	0.496021	Indoor (except home)
2	0.13	0.49633	Indoor (except home)
2	0.1	0.49633	Indoor (except home)
2	0.13	0.49633	Indoor (except home)
2	0.21	0.36691	Other
2	0.09	0.517612	Other
2	0.23	0.517612	Home
2	0.27	0.517612	Home
2	0.29	0.517612	Home
2	0.25	0.517612	Home
2	0.37	0.517612	Home
2	0.29	0.517612	Home
2	0.24	0.517612	Home
2	0.25	0.517612	Home
2	0.38	0.517612	Home
2	0.28	0.517612	Home
2	0.27	0.517612	Home
2	0.25	0.517612	Home
2	0.22	0.517612	Home
2	0.32	0.517612	Home
2	0.1	0.50165	Other
2	0.2	0.49633	Indoor (except home)
2	0.16	0.517612	Other
2	0.18	0.517612	Home
2	0.12	0.517612	Home
2	0.1	0.517612	Home
2	0.1	0.517612	Home
2	0.1	0.517612	Home
2	0.08	0.517612	Home
3	0.12	0.367945	Home
3	0.16	0.400102	Other
3	0.14	0.5356	Other
3	0.34	0.652679	Outdoor
3	0.22	0.652679	Outdoor
3	0.15	0.340495	Other
3	0.13	0.484241	Indoor (except home)
3	0.21	0.377124	Other
3	0.17	0.358544	Outdoor
3	0.3	0.369111	Outdoor
3	0.13	0.49851	Other
3	0.11	0.43226	Transport
3	0.07	0.367945	Home
3	0.14	0.367945	Home
3	0.14	0.367945	Home
3	0.2	0.367945	Home
3	0.18	0.367945	Home
3	0.12	0.367945	Home
3	0.07	0.367945	Home
3	0.19	0.367945	Home
3	0.13	0.367945	Home
3	0.14	0.367945	Home
3	0.11	0.367945	Home
3	0.11	0.367945	Home
3	0.14	0.367945	Home
3	0.2	0.400102	Other
3	0.18	0.455215	Other
3	0.26	0.331137	Outdoor
3	0.31	0.331137	Outdoor
3	0.15	0.372496	Other
3	0.2	0.496574	Indoor (except home)
3	0.23	0.372496	Other
3	0.2	0.331137	Outdoor
3	0.22	0.331137	Outdoor
3	0.13	0.455215	Other
3	0.14	0.43226	Transport
3	0.15	0.367945	Home
3	0.12	0.367945	Home
3	0.14	0.367945	Home
3	0.1	0.367945	Home
3	0.15	0.367945	Home
3	0.18	0.367945	Home
3	0.12	0.367945	Home
3	0.13	0.367945	Home
3	0.2	0.367945	Home
3	0.16	0.367945	Home
3	0.13	0.367945	Home
3	0.12	0.367945	Home
3	0.15	0.367945	Home
3	0.18	0.355822	Other
3	0.18	0.453558	Other
3	0.28	0.424592	Outdoor
3	0.32	0.424962	Outdoor
3	0.17	0.428982	Other
3	0.2	0.51098	Indoor (except home)
3	0.12	0.372053	Other
3	0.25	0.429086	Outdoor
3	0.22	0.424608	Outdoor
3	0.12	0.46986	Other
3	0.17	0.387844	Transport
3	0.16	0.367945	Home
3	0.25	0.367945	Home
3	0.2	0.361254	Home
3	0.13	0.367945	Home
3	0.13	0.367945	Home
3	0.1	0.367945	Home
3	0.18	0.367945	Home
3	0.15	0.367945	Home
3	0.07	0.367945	Home
3	0.14	0.367945	Home
3	0.14	0.367945	Home
3	0.19	0.367945	Home
3	0.18	0.367945	Home
3	0.13	0.367945	Home
3	0.13	0.367945	Home
3	0.16	0.402834	Transport
3	0.16	0.39732	Transport
3	0.11	0.353381	Other
3	0.18	0.367945	Home
3	0.12	0.367945	Home
3	0.13	0.367945	Home
3	0.19	0.374594	Home
3	0.07	0.440331	Other
3	0.12	0.421777	Indoor (except home)
3	0.43	0.426616	Indoor (except home)
3	0.09	0.419692	Indoor (except home)
3	0.05	0.399743	Indoor (except home)
3	0.03	0.356062	Indoor (except home)
3	0.01	0.356062	Indoor (except home)
3	0.16	0.356062	Indoor (except home)
3	0.05	0.356062	Indoor (except home)
3	0.07	0.359033	Other
3	0.11	0.367945	Home
3	0.13	0.367945	Home
3	0.19	0.367945	Home
3	0.14	0.367945	Home
3	0.14	0.367945	Home
3	0.13	0.367945	Home
3	0.09	0.367945	Home
3	0.17	0.367945	Home
3	0.15	0.367945	Home
3	0.2	0.367945	Home
3	0.13	0.367945	Home
3	0.12	0.367945	Home
3	0.14	0.367945	Home
3	0.14	0.367945	Home
3	0.09	0.359033	Other
3	0.12	0.356062	Indoor (except home)
3	0.17	0.356062	Indoor (except home)
3	0.09	0.356062	Indoor (except home)
3	0.07	0.356062	Indoor (except home)
3	0.07	0.356062	Indoor (except home)
3	0.19	0.367945	Home
3	0.21	0.367945	Home
3	0.11	0.367945	Home
3	0.17	0.367945	Home
3	0.17	0.367945	Home
3	0.11	0.367945	Home
3	0.1	0.367945	Home
3	0.16	0.367945	Home
3	0.16	0.367945	Home
3	0.11	0.367945	Home
3	0.12	0.367945	Home
3	0.09	0.367945	Home
3	0.15	0.367945	Home
3	0.16	0.367945	Home
3	0.14	0.367945	Home
3	0.21	0.367945	Home
3	0.15	0.360663	Home
3	0.2	0.353381	Home
3	0.15	0.352739	Home
3	0.04	0.360663	Home
3	0.13	0.367945	Home
3	0.12	0.367945	Home
3	0.19	0.367945	Home
3	0.12	0.367945	Home
3	0.1	0.367945	Home
3	0.14	0.367945	Home
3	0.15	0.367945	Home
3	0.16	0.367945	Home
3	0.1	0.367945	Home
3	0.19	0.357925	Other
3	0.09	0.503308	Other
3	0.47	0.591291	Outdoor
3	0.45	0.64093	Outdoor
3	0.42	0.565928	Other
3	0.33	0.501324	Indoor (except home)
3	0.81	0.810256	Other
3	0.55	0.807835	Outdoor
3	0.99	0.731254	Outdoor
3	0.17	0.574545	Other
3	0.09	0.356884	Transport
3	0.15	0.360663	Home
3	0.16	0.352113	Home
3	0.07	0.353381	Home
3	0.18	0.367945	Home
3	0.12	0.367945	Home
3	0.15	0.367945	Home
3	0.16	0.367945	Home
3	0.19	0.360663	Home
3	0.1	0.353635	Home
3	0.09	0.367945	Home
3	0.17	0.367945	Home
3	0.2	0.367945	Home
3	0.14	0.360663	Home
3	0.13	0.357975	Other
3	0.07	0.496195	Indoor (except home)
3	0.12	0.499279	Indoor (except home)
3	0.09	0.498196	Indoor (except home)
3	0.1	0.496574	Indoor (except home)
3	0.13	0.496574	Indoor (except home)
3	0.07	0.654951	Transport
3	0.12	0.813327	Outdoor
3	0.2	0.813327	Outdoor
3	0.27	0.575763	Other
3	0.12	0.385322	Transport
3	0.11	0.367945	Home
3	0.1	0.367945	Home
3	0.14	0.367945	Home
3	0.14	0.367945	Home
3	0.1	0.367945	Home
3	0.14	0.367945	Home
4	0.07	0.357872	Home
4	0.08	0.357932	Other
4	0.07	0.466901	Indoor (except home)
4	0.24	0.472716	Indoor (except home)
4	0.21	0.487469	Indoor (except home)
4	0.18	0.458527	Indoor (except home)
4	0.11	0.497805	Indoor (except home)
4	0.15	0.497867	Indoor (except home)
4	0.3	0.486748	Indoor (except home)
4	0.44	0.481013	Indoor (except home)
4	0.17	0.47556	Indoor (except home)
4	0.15	0.41696	Other
4	0.09	0.392751	Home
4	0.14	0.357872	Home
4	0.12	0.357872	Home
4	0.09	0.357872	Home
4	0.12	0.357872	Home
4	0.11	0.357872	Home
4	0.09	0.357872	Home
4	0.08	0.357872	Home
4	0.04	0.357872	Home
4	0.07	0.357872	Home
4	0.12	0.357872	Home
4	0.12	0.357872	Home
4	0.07	0.357872	Home
4	0.13	0.376244	Other
4	0.12	0.449338	Indoor (except home)
4	0.14	0.399084	Indoor (except home)
4	0.2	0.405552	Indoor (except home)
4	0.06	0.454139	Indoor (except home)
4	0.09	0.514351	Indoor (except home)
4	0.07	0.376347	Indoor (except home)
4	0.26	0.47982	Indoor (except home)
4	0.18	0.487589	Indoor (except home)
4	0.11	0.473213	Indoor (except home)
4	0.12	0.43372	Other
4	0.06	0.357872	Home
4	0.11	0.357872	Home
4	0.09	0.357872	Home
4	0.05	0.357872	Home
4	0.05	0.357872	Home
4	0.12	0.357872	Home
4	0.06	0.357872	Home
4	0.11	0.357872	Home
4	0.12	0.357872	Home
4	0.07	0.357872	Home
4	0.05	0.357872	Home
4	0.14	0.357872	Home
4	0.12	0.357872	Home
4	0.13	0.357872	Home
4	0.13	0.357872	Home
4	0.05	0.357872	Home
4	0.06	0.357872	Home
4	0.08	0.357872	Home
4	0.08	0.357872	Home
4	0.12	0.357872	Home
4	0.09	0.357872	Home
4	0.07	0.357872	Home
4	0.12	0.357872	Home
4	0.09	0.357872	Home
4	0.04	0.357872	Home
4	0.08	0.357872	Home
4	0.12	0.357872	Home
4	0.08	0.357872	Home
4	0.18	0.357872	Home
4	0.13	0.357872	Home
4	0.11	0.357872	Home
4	0.07	0.357872	Home
4	0.01	0.357872	Home
4	0.04	0.357872	Home
4	0.08	0.357872	Home
4	0.12	0.357872	Home
4	0.07	0.357872	Home
4	0.08	0.357872	Home
4	0.08	0.357872	Home
4	0.08	0.357872	Home
4	0.07	0.357872	Home
4	0.12	0.357872	Home
4	0.15	0.357872	Home
4	0.11	0.357872	Home
4	0.15	0.357872	Home
4	0.08	0.357872	Home
4	0.12	0.357872	Home
4	0.11	0.357872	Home
4	0.11	0.357872	Home
4	0.09	0.357872	Home
4	0.08	0.357872	Home
4	0.09	0.357872	Home
4	0.11	0.357872	Home
4	0.11	0.357872	Home
4	0.11	0.357872	Home
4	0.09	0.357872	Home
4	0.12	0.357872	Home
4	0.13	0.357872	Home
4	0.06	0.357872	Home
4	0.07	0.357872	Home
4	0.07	0.357872	Home
4	0.09	0.357872	Home
4	0.09	0.357872	Home
4	0.08	0.357872	Home
4	0.18	0.357872	Home
4	0.09	0.357872	Home
4	0.12	0.309385	Home
4	0.15	0.357872	Home
4	0.11	0.296053	Home
4	0.21	0.379965	Home
4	0.11	0.437981	Other
4	0.07	0.357872	Home
4	0.15	0.357872	Home
4	0.11	0.357872	Home
4	0.05	0.357872	Home
4	0.12	0.357872	Home
4	0.17	0.357872	Home
4	0.12	0.357872	Home
4	0.11	0.357872	Home
4	0.14	0.357872	Home
4	0.08	0.357872	Home
4	0.06	0.357872	Home
4	0.14	0.357872	Home
4	0.09	0.357872	Home
4	0.08	0.357872	Home
4	0.11	0.358931	Other
4	0.07	0.497867	Outdoor
4	0.24	0.47781	Outdoor
4	0.44	0.474713	Outdoor
4	0.19	0.450487	Outdoor
4	0.19	0.501815	Outdoor
4	0.14	0.451917	Outdoor
4	0.31	0.473936	Outdoor
4	0.2	0.472832	Outdoor
4	0.09	0.461923	Outdoor
4	0.22	0.380155	Other
4	0.13	0.396991	Home
4	0.11	0.357872	Home
4	0.17	0.357872	Home
4	0.07	0.357872	Home
4	0.13	0.357872	Home
4	0.04	0.357872	Home
4	0.18	0.357872	Home
4	0.09	0.357872	Home
4	0.07	0.357872	Home
4	0.15	0.357872	Home
4	0.13	0.357872	Home
4	0.13	0.357872	Home
4	0.13	0.357872	Home
4	0.06	0.378159	Other
4	0.14	0.490546	Indoor (except home)
4	0.05	0.497867	Indoor (except home)
4	0.05	0.497867	Indoor (except home)
4	0.05	0.497867	Indoor (except home)
4	0.08	0.497867	Indoor (except home)
4	0.14	0.497867	Outdoor
4	0.11	0.497867	Outdoor
4	0.3	0.497867	Outdoor
4	0.07	0.497867	Outdoor
4	0.05	0.357872	Home
4	0.14	0.357872	Home
4	0.19	0.357872	Home
4	0.13	0.357872	Home
4	0.11	0.357872	Home
4	0.18	0.357872	Home
4	0.05	0.357872	Home
4	0.07	0.357872	Home
4	0.09	0.357872	Home
4	0.12	0.357872	Home
4	0.15	0.357872	Home
4	0.11	0.357872	Home
4	0.13	0.357872	Home
4	0.07	0.392871	Other
4	0.11	0.497867	Indoor (except home)
4	0.24	0.488585	Indoor (except home)
4	0.24	0.477141	Indoor (except home)
4	0.08	0.476165	Indoor (except home)
4	0.18	0.476165	Indoor (except home)
4	0.12	0.476165	Indoor (except home)
4	0.21	0.476165	Indoor (except home)
4	0.26	0.476165	Indoor (except home)
4	0.15	0.476165	Indoor (except home)
4	0.13	0.387445	Other
4	0.09	0.357872	Home
4	0.12	0.357872	Home
4	0.08	0.357872	Home
4	0.06	0.357872	Home
4	0.11	0.357872	Home
4	0.09	0.357872	Home
5	0.2	0.572854	Home
5	0.14	0.553692	Transport
5	0.06	0.495953	Indoor (except home)
5	0.14	0.671717	Other
5	0.12	1.03257	Other
5	0.12	0.685091	Outdoor
5	0.13	0.522422	Indoor (except home)
5	0.15	0.512852	Other
5	0.15	0.509773	Other
5	0.18	0.56259	Other
5	0.08	0.475333	Other
5	0.23	0.572854	Other
5	0.12	0.572854	Home
5	0.12	0.572854	Home
5	0.16	0.572854	Home
5	0.15	0.572854	Home
5	0.21	0.572854	Home
5	0.13	0.572854	Home
5	0.15	0.572854	Home
5	0.14	0.572854	Home
5	0.2	0.572854	Home
5	0.13	0.572854	Home
5	0.11	0.572854	Home
5	0.21	0.572854	Home
5	0.11	0.535082	Transport
5	0.09	0.49731	Indoor (except home)
5	0.06	0.259845	Indoor (except home)
5	0.11	0.502261	Other
5	0.12	0.498707	Other
5	0.06	0.488044	Other
5	0.14	0.572854	Home
5	0.15	0.572854	Home
5	0.13	0.572854	Home
5	0.13	0.572854	Home
5	0.19	0.572854	Home
5	0.22	0.572854	Home
5	0.11	0.572854	Home
5	0.15	0.572854	Home
5	0.2	0.572854	Home
5	0.12	0.572854	Home
5	0.11	0.572854	Home
5	0.13	0.572854	Home
5	0.06	0.535559	Other
5	0.04	0.495437	Indoor (except home)
5	0.05	0.49731	Indoor (except home)
5	0.08	0.49731	Indoor (except home)
5	0.04	0.49731	Indoor (except home)
5	0.07	0.49731	Indoor (except home)
5	0.11	0.526545	Other
5	0.12	0.52616	Indoor (except home)
5	0.12	0.525422	Indoor (except home)
5	0.05	0.492176	Other
5	0.01	0.49731	Indoor (except home)
5	0.06	0.529519	Transport
5	0.16	0.577704	Home
5	0.11	0.572854	Home
5	0.21	0.572854	Home
5	0.2	0.58301	Home
5	0.21	0.572854	Home
5	0.12	0.572854	Home
5	0.22	0.572854	Home
5	0.2	0.572854	Home
5	0.19	0.572854	Home
5	0.13	0.572854	Home
5	0.19	0.572854	Home
5	0.27	0.583458	Home
5	0.04	0.562112	Other
5	0.07	0.495414	Indoor (except home)
5	0.04	0.49731	Indoor (except home)
5	0.04	0.49731	Indoor (except home)
5	0.01	0.49731	Indoor (except home)
5	0.09	0.49731	Indoor (except home)
5	0.07	0.475719	Transport
5	0.09	0.521465	Transport
5	0.06	0.503429	Transport
5	0.14	0.466996	Transport
5	0.12	0.617966	Transport
5	0.09	0.434159	Transport
6	0.06	0.65235	Home
6	0.13	0.590718	Other
6	0.18	0.405821	Outdoor
6	0.25	0.405821	Outdoor
6	0.26	0.405821	Outdoor
6	0.22	0.405821	Outdoor
6	0.23	0.451076	Other
6	0.26	0.405821	Outdoor
6	0.27	0.405821	Outdoor
6	0.21	0.405821	Outdoor
6	0.15	0.405821	Other
6	0.16	0.65235	Other
6	0.05	0.65235	Home
6	0.09	0.628301	Outdoor
6	0.17	0.526572	Other
6	0.26	0.526572	Other
6	0.11	0.65235	Home
6	0.07	0.65235	Home
6	0.06	0.65235	Home
6	0.07	0.65235	Home
6	0.04	0.65235	Home
6	0.04	0.65235	Home
6	0.03	0.65235	Home
6	0.04	0.65235	Home
6	0.09	0.65235	Home
6	0.13	0.569236	Other
6	0.18	0.403007	Other
6	0.37	0.319893	Outdoor
6	0.31	0.319893	Outdoor
6	0.16	0.319893	Outdoor
6	0.18	0.49633	Other
6	0.25	0.319893	Outdoor
6	0.3	0.319893	Outdoor
6	0.27	0.319893	Outdoor
6	0.1	0.319893	Other
6	0.12	0.595682	Other
6	0.11	0.624016	Other
6	0.11	0.65235	Home
6	0.06	0.65235	Home
6	0.09	0.65235	Home
6	0.06	0.65235	Home
6	0.05	0.65235	Home
6	0.1	0.65235	Home
6	0.12	0.65235	Home
6	0.05	0.65235	Home
6	0.12	0.65235	Home
6	0.04	0.65235	Home
6	0.04	0.65235	Home
6	0.13	0.65235	Home
6	0.07	0.65235	Home
6	0.05	0.65235	Home
6	0.07	0.65235	Home
6	0.12	0.65235	Home
6	0.1	0.546564	Transport
6	0.11	0.440778	Indoor (except home)
6	0.07	0.440778	Indoor (except home)
6	0.07	0.440778	Indoor (except home)
6	0.09	0.401171	Other
6	0.08	0.425622	Transport
6	0.06	0.65235	Home
6	0.07	0.65235	Home
6	0.1	0.65235	Home
6	0.03	0.65235	Home
6	0.05	0.65235	Home
6	0.06	0.65235	Home
6	0.11	0.65235	Home
6	0.07	0.65235	Home
6	0.06	0.65235	Home
6	0.08	0.65235	Home
6	0.08	0.65235	Home
6	0.06	0.65235	Home
6	0.06	0.65235	Home
6	0.04	0.65235	Home
6	0.16	0.473152	Transport
6	0.13	0.284271	Other
6	0.11	0.275066	Indoor (except home)
6	0.15	0.274395	Indoor (except home)
6	0.09	0.283017	Indoor (except home)
6	0.17	0.292904	Indoor (except home)
6	0.11	0.292904	Indoor (except home)
6	0.02	0.292904	Indoor (except home)
6	0.19	0.292904	Indoor (except home)
6	0.23	0.292904	Indoor (except home)
6	0.15	0.367691	Other
6	0.51	0.557464	Other
6	0.09	0.65235	Home
6	0.07	0.65235	Home
6	0.15	0.65235	Home
6	0.07	0.65235	Home
6	0.07	0.65235	Home
6	0.11	0.65235	Home
6	0.03	0.65235	Home
6	0.11	0.65235	Home
6	0.12	0.65235	Home
6	0.04	0.65235	Home
6	0.07	0.65235	Home
6	0.07	0.65235	Home
6	0.09	0.65235	Home
6	0.06	0.65235	Home
6	0.06	0.65235	Home
6	0.07	0.65235	Home
6	0.11	0.65235	Home
6	0.11	0.65235	Home
6	0.05	0.65235	Home
6	0.08	0.65235	Home
6	0.07	0.65235	Home
6	0.1	0.65235	Home
6	0.08	0.65235	Home
6	0.09	0.65235	Home
6	0.08	0.65235	Home
6	0.02	0.65235	Home
6	0.09	0.65235	Home
6	0.06	0.65235	Home
6	0.07	0.65235	Home
6	0.06	0.65235	Home
6	0.03	0.65235	Home
6	0.06	0.65235	Home
6	0.15	0.65235	Home
6	0.11	0.65235	Home
6	0.09	0.65235	Home
6	0.09	0.65235	Home
6	0.08	0.597903	Other
6	0.16	0.492044	Other
6	0.27	0.39087	Outdoor
6	0.32	0.388972	Outdoor
6	0.17	0.468884	Outdoor
6	0.16	0.498824	Other
6	0.16	0.405821	Outdoor
6	0.27	0.405821	Outdoor
6	0.32	0.405821	Outdoor
6	0.16	0.451076	Other
6	0.21	0.499557	Other
6	0.11	0.427904	Other
6	0.07	0.491175	Other
6	0.08	0.65235	Home
6	0.07	0.65235	Home
6	0.09	0.65235	Home
6	0.11	0.65235	Home
6	0.14	0.65235	Home
6	0.07	0.65235	Home
6	0.09	0.65235	Home
6	0.14	0.65235	Home
6	0.07	0.65235	Home
6	0.05	0.65235	Home
6	0.05	0.65235	Home
6	0.16	0.607897	Other
6	0.12	0.503756	Other
6	0.12	0.500959	Indoor (except home)
6	0.12	0.5004	Indoor (except home)
6	0.09	0.500451	Indoor (except home)
6	0.11	0.496338	Other
6	0.16	0.448248	Outdoor
6	0.2	0.408043	Outdoor
6	0.21	0.38294	Outdoor
6	0.15	0.392997	Other
6	0.14	0.484616	Other
6	0.03	0.598428	Other
6	0.08	0.65235	Home
6	0.08	0.65235	Home
6	0.1	0.65235	Home
6	0.06	0.65235	Home
6	0.07	0.65235	Home
6	0.08	0.65235	Home
6	0.1	0.65235	Home
6	0.06	0.65235	Home
6	0.11	0.65235	Home
6	0.04	0.65235	Home
6	0.08	0.65235	Home
6	0.06	0.65235	Home
6	0.12	0.613345	Other
6	0.17	0.408111	Other
6	0.31	0.319893	Outdoor
6	0.24	0.319893	Outdoor
6	0.14	0.412206	Other
6	0.19	0.501815	Indoor (except home)
6	0.26	0.386	Outdoor
6	0.19	0.319893	Outdoor
6	0.23	0.319893	Outdoor
6	0.14	0.408111	Other
6	0.15	0.492896	Transport
6	0.05	0.608215	Other
6	0.09	0.65235	Home
6	0.09	0.65235	Home
6	0.08	0.65235	Home
6	0.1	0.65235	Home
6	0.09	0.65235	Home
8	0.26	0.497395	Home
8	0.32	0.497395	Home
8	0.01	0.500277	Indoor (except home)
8	0.03	0.496819	Indoor (except home)
8	0.06	0.494373	Other
8	0.47	0.534843	Transport
8	0.13	0.499888	Transport
8	0.04	0.528718	Transport
8	0.07	0.628766	Transport
8	0.33	0.626215	Transport
8	0.08	0.550211	Transport
8	0.07	0.496819	Indoor (except home)
8	0.01	0.496819	Indoor (except home)
8	0.15	0.418817	Transport
8	0.21	0.46323	Home
8	0.22	0.463505	Home
8	0.21	0.484674	Home
8	0.19	0.497395	Home
8	0.28	0.497395	Home
8	0.2	0.497395	Home
8	0.25	0.497395	Home
8	0.2	0.497395	Home
8	0.28	0.497395	Home
8	0.12	0.497395	Home
8	0.2	0.481576	Home
8	0.07	0.500553	Indoor (except home)
8	0.06	0.496819	Indoor (except home)
8	0.08	0.525556	Other
8	0.13	0.602037	Transport
8	0.22	0.421743	Transport
8	0.41	0.618518	Transport
8	0.3	0.662883	Transport
8	0.29	0.643738	Transport
8	0.29	0.670052	Transport
8	0.13	0.624778	Transport
8	0.07	0.496819	Indoor (except home)
8	0.08	0.496819	Indoor (except home)
8	0.1	0.497395	Home
8	0.14	0.497395	Home
8	0.19	0.497395	Home
8	0.22	0.497395	Home
8	0.18	0.497395	Home
8	0.23	0.497395	Home
8	0.15	0.497395	Home
8	0.2	0.497395	Home
8	0.24	0.497395	Home
8	0.22	0.497395	Home
8	0.18	0.497395	Home
8	0.2	0.497395	Home
8	0.1	0.496819	Indoor (except home)
8	0.04	0.496819	Indoor (except home)
8	0.09	0.496819	Other
8	0.23	0.466611	Transport
8	0.14	0.481649	Transport
8	0.22	0.570033	Transport
8	0.17	0.640839	Transport
8	0.2	0.510776	Indoor (except home)
8	0.06	0.496819	Indoor (except home)
8	0.03	0.496819	Indoor (except home)
8	0.02	0.496819	Indoor (except home)
8	0.12	0.431214	Home
8	0.22	0.479779	Home
8	0.23	0.4798	Home
8	0.19	0.497395	Home
8	0.2	0.497395	Home
8	0.15	0.497395	Home
8	0.2	0.497395	Home
8	0.23	0.497395	Home
8	0.26	0.497395	Home
8	0.13	0.497395	Home
8	0.14	0.497395	Home
8	0.14	0.497395	Home
8	0.11	0.498114	Indoor (except home)
8	0.06	0.496819	Indoor (except home)
8	0.07	0.496819	Other
8	0.04	0.461145	Transport
8	0.09	0.519473	Transport
8	0.19	0.568034	Transport
8	0.26	0.680242	Transport
8	0.1	0.510524	Indoor (except home)
8	0.1	0.324832	Indoor (except home)
8	0.14	0.345705	Indoor (except home)
8	0.14	0.388703	Indoor (except home)
8	0.28	0.465171	Transport
8	0.17	0.497395	Home
8	0.2	0.479983	Home
8	0.19	0.480249	Home
8	0.2	0.497395	Home
8	0.18	0.497395	Home
8	0.1	0.497395	Home
8	0.18	0.497395	Home
8	0.24	0.497395	Home
8	0.3	0.497395	Home
8	0.15	0.497395	Home
8	0.21	0.497395	Home
8	0.17	0.497395	Home
8	0.13	0.497395	Home
8	0.19	0.497395	Home
8	0.26	0.4615	Other
8	0.15	0.431289	Transport
8	0.14	0.588644	Transport
8	0.08	0.427863	Transport
8	0.11	0.143939	Transport
8	0.12	0.183491	Transport
8	0.12	0.407746	Transport
8	0.22	0.419101	Transport
8	0.24	0.471139	Transport
8	0.19	0.497395	Home
8	0.19	0.497395	Home
8	0.24	0.479187	Home
8	0.22	0.487606	Home
8	0.15	0.497395	Home
8	0.13	0.497395	Home
8	0.18	0.497395	Home
8	0.19	0.497395	Home
8	0.18	0.497395	Home
8	0.21	0.483965	Home
8	0.21	0.497395	Home
8	0.25	0.497395	Home
8	0.28	0.497395	Home
8	0.25	0.497395	Home
8	0.18	0.497395	Home
8	0.14	0.496953	Transport
8	0.09	0.414115	Transport
8	0.22	0.637389	Outdoor
8	0.21	0.651388	Transport
8	0.19	0.493965	Transport
8	0.31	0.497395	Home
8	0.23	0.380168	Transport
8	0.19	0.480616	Transport
8	0.21	0.510681	Other
8	0.15	0.458489	Home
8	0.2	0.479187	Home
8	0.19	0.464898	Home
8	0.13	0.497395	Home
8	0.14	0.497395	Home
8	0.12	0.497395	Home
8	0.23	0.497395	Home
8	0.26	0.497395	Home
8	0.25	0.497395	Home
8	0.1	0.497395	Home
8	0.15	0.497395	Home
8	0.12	0.497395	Home
8	0.22	0.497395	Home
8	0.17	0.497395	Home
8	0.11	0.497395	Home
8	0.09	0.497395	Home
8	0.12	0.497395	Home
8	0.25	0.479187	Other
8	0.15	0.497395	Home
8	0.15	0.497395	Home
8	0.29	0.497395	Home
8	0.19	0.479187	Home
8	0.18	0.479486	Other
8	0.23	0.462284	Other
8	0.19	0.497395	Home
8	0.23	0.479187	Home
8	0.12	0.463875	Other
8	0.18	0.487	Home
8	0.22	0.483965	Home
8	0.13	0.497395	Home
8	0.29	0.497395	Home
8	0.19	0.497395	Home
8	0.19	0.497395	Home
8	0.34	0.497395	Home
8	0.21	0.497395	Home
8	0.21	0.483965	Home
8	0.17	0.498783	Indoor (except home)
8	0.07	0.496819	Indoor (except home)
8	0.06	0.496819	Indoor (except home)
8	0.08	0.496819	Indoor (except home)
8	0.1	0.496819	Indoor (except home)
8	0.07	0.496819	Indoor (except home)
8	0.07	0.496819	Indoor (except home)
8	0.04	0.496819	Indoor (except home)
8	0.07	0.496819	Indoor (except home)
8	0.08	0.496819	Indoor (except home)
9	0.08	0.450411	Other
9	0.1	0.49731	Indoor (except home)
9	0.07	0.46302	Other
9	0.11	0.352365	Other
9	0.06	0.389555	Other
9	0.08	0.441454	Other
9	0.16	0.440668	Other
9	0.12	0.498851	Home
9	0.16	0.498851	Home
9	0.12	0.498851	Home
9	0.17	0.498851	Home
9	0.11	0.498851	Home
9	0.21	0.498851	Home
9	0.15	0.498851	Home
9	0.15	0.498851	Home
9	0.15	0.498851	Home
9	0.17	0.498851	Home
9	0.17	0.498851	Home
9	0.15	0.498851	Home
9	0.13	0.49808	Other
9	0.04	0.49731	Indoor (except home)
9	0.11	0.524755	Other
9	0.15	0.377028	Other
9	0.13	0.373881	Other
9	0.16	0.388848	Other
9	0.08	0.407689	Other
9	0.15	0.386178	Other
9	0.15	0.391469	Other
9	0.23	0.390535	Other
9	0.08	0.466166	Other
9	0.16	0.465791	Home
9	0.15	0.517754	Home
9	0.22	0.498851	Home
9	0.17	0.498851	Home
9	0.17	0.498851	Home
9	0.17	0.498851	Home
9	0.11	0.498851	Home
9	0.13	0.498851	Home
9	0.23	0.498851	Home
9	0.18	0.498851	Home
9	0.18	0.498851	Home
9	0.15	0.498851	Home
9	0.13	0.498851	Home
9	0.18	0.422157	Other
9	0.05	0.50053	Indoor (except home)
9	0.13	0.50208	Other
9	0.24	0.457907	Other
9	0.06	0.43985	Other
9	0.07	0.408643	Other
9	0.16	0.432692	Other
9	0.17	0.584286	Other
9	0.05	0.595048	Other
9	0.06	0.447849	Other
9	0.15	0.54197	Other
9	0.1	0.430239	Other
9	0.19	0.518436	Home
9	0.15	0.498851	Home
9	0.16	0.498851	Home
9	0.1	0.498851	Home
9	0.12	0.498851	Home
9	0.12	0.498851	Home
9	0.15	0.498851	Home
9	0.07	0.498851	Home
9	0.13	0.498851	Home
9	0.12	0.498851	Home
9	0.17	0.498851	Home
9	0.12	0.498851	Home
9	0.15	0.441425	Other
9	0.1	0.49731	Indoor (except home)
9	0.07	0.496711	Indoor (except home)
9	0.02	0.491125	Indoor (except home)
9	0.07	0.488572	Indoor (except home)
9	0.1	0.499292	Indoor (except home)
9	0.16	0.384414	Other
9	0.11	0.373729	Other
9	0.15	0.417003	Other
9	0.17	0.513758	Other
9	0.06	0.43807	Other
9	0.17	0.498851	Home
9	0.12	0.498851	Home
9	0.1	0.498851	Home
9	0.12	0.498851	Home
9	0.12	0.498851	Home
10	0.05	0.0850112	Home
10	0.13	0.0953522	Outdoor
10	0.1	0.0948263	Outdoor
10	0.17	0.0939084	Outdoor
10	0.05	0.113241	Transport
10	0.07	0.126996	Transport
10	0.1	0.0935841	Outdoor
10	0.09	0.0885587	Other
10	0.08	0.091217	Other
10	0.1	0.0940158	Other
10	0.08	0.0950012	Outdoor
10	0.13	0.0940964	Outdoor
10	0.11	0.0870636	Other
10	0.11	0.0850112	Home
10	0.08	0.0850112	Home
10	0.11	0.0850112	Home
10	0.1	0.0850112	Home
10	0.1	0.0850112	Home
10	0.1	0.0850112	Home
10	0.12	0.0850112	Home
10	0.09	0.0850112	Home
10	0.11	0.0850112	Home
10	0.08	0.0850112	Home
10	0.12	0.0850112	Home
10	0.09	0.0882958	Home
10	0.09	0.0940584	Outdoor
10	0.03	0.0915642	Transport
10	0.08	0.0945148	Outdoor
10	0.14	0.0948538	Outdoor
10	0.07	0.0941348	Other
10	0.07	0.0862096	Transport
10	0.04	0.131307	Transport
10	0.07	0.110598	Transport
10	0.08	0.0945757	Outdoor
10	0.1	0.0947121	Outdoor
10	0.12	0.0953522	Outdoor
10	0.11	0.0850112	Home
10	0.14	0.0850112	Home
10	0.1	0.0850112	Home
10	0.09	0.0850112	Home
10	0.09	0.0850112	Home
10	0.12	0.0850112	Home
10	0.1	0.0850112	Home
10	0.11	0.0850112	Home
10	0.05	0.0850112	Home
10	0.1	0.0850112	Home
10	0.13	0.0850112	Home
10	0.06	0.0953522	Outdoor
10	0.1	0.0953522	Outdoor
10	0.12	0.0901817	Other
10	0.08	0.0850112	Home
10	0.05	0.127289	Other
10	0.06	0.127289	Outdoor
10	0.08	0.127289	Other
10	0.1	0.0901817	Other
10	0.09	0.0850112	Home
10	0.09	0.0850112	Home
10	0.13	0.0850112	Home
10	0.11	0.0850112	Home
10	0.07	0.0850112	Home
10	0.08	0.0850112	Home
10	0.11	0.0850112	Home
10	0.06	0.0850112	Home
10	0.06	0.0850112	Home
10	0.09	0.0850112	Home
10	0.17	0.0850112	Home
10	0.17	0.0850112	Home
10	0.05	0.0873042	Home
10	0.08	0.0945938	Outdoor
10	0.08	0.0935998	Outdoor
10	0.11	0.0934952	Outdoor
10	0.1	0.0933372	Outdoor
10	0.15	0.0934161	Outdoor
10	0.11	0.0953522	Outdoor
10	0.1	0.0938604	Outdoor
10	0.1	0.0953522	Outdoor
10	0.09	0.0946896	Outdoor
10	0.1	0.0946002	Outdoor
10	0.11	0.0953522	Other
10	0.11	0.0850112	Home
10	0.07	0.0850112	Home
10	0.06	0.0850112	Home
10	0.09	0.0850112	Home
10	0.06	0.0850112	Home
10	0.11	0.0850112	Home
10	0.09	0.0850112	Home
10	0.13	0.0850112	Home
10	0.05	0.0850112	Home
10	0.1	0.0850112	Home
10	0.13	0.0850112	Home
10	0.09	0.0850112	Home
10	0.09	0.0873925	Home
10	0.07	0.0940563	Outdoor
10	0.1	0.0947181	Outdoor
10	0.12	0.0953522	Outdoor
10	0.11	0.0953522	Outdoor
10	0.12	0.0953522	Outdoor
10	0.12	0.0953522	Outdoor
10	0.08	0.0875965	Other
10	0.17	0.0901817	Other
10	0.12	0.0953522	Outdoor
10	0.12	0.0943043	Outdoor
10	0.16	0.0953522	Outdoor
10	0.06	0.0850112	Home
10	0.1	0.0850112	Other
10	0.05	0.0850112	Indoor (except home)
10	0.04	0.0850112	Indoor (except home)
10	0.13	0.0850112	Home
10	0.12	0.0850112	Home
10	0.12	0.0850112	Home
10	0.1	0.0850112	Home
10	0.13	0.0850112	Home
10	0.09	0.0850112	Home
10	0.1	0.0850112	Home
10	0.13	0.0850112	Home
10	0.1	0.088116	Home
10	0.07	0.0918128	Outdoor
10	0.06	0.0895983	Outdoor
10	0.06	0.0873793	Outdoor
10	0.07	0.0953522	Outdoor
10	0.12	0.0953522	Outdoor
10	0.1	0.0953522	Outdoor
10	0.09	0.0953522	Outdoor
10	0.11	0.0953522	Outdoor
10	0.09	0.0953522	Outdoor
10	0.07	0.0953522	Outdoor
10	0.12	0.0901817	Other
10	0.06	0.0850112	Home
10	0.08	0.0850112	Home
10	0.1	0.0850112	Home
10	0.11	0.0850112	Home
10	0.09	0.0850112	Home
10	0.13	0.0850112	Home
10	0.09	0.0850112	Home
10	0.1	0.0850112	Home
10	0.11	0.0850112	Home
10	0.08	0.0850112	Home
10	0.03	0.0850112	Home
10	0.09	0.0850112	Home
10	0.11	0.0850112	Home
10	0.1	0.0850112	Home
10	0.1	0.0850112	Home
10	0.15	0.0850112	Home
10	0.09	0.0850112	Home
10	0.06	0.0857535	Other
10	0.1	0.0937083	Outdoor
10	0.09	0.0899836	Other
10	0.08	0.0879281	Other
10	0.1	0.0940159	Outdoor
10	0.13	0.0940839	Outdoor
10	0.14	0.0877758	Transport
10	0.13	0.0850112	Home
10	0.08	0.0850112	Home
10	0.1	0.0850112	Home
10	0.08	0.0850112	Home
10	0.06	0.0850112	Home
10	0.06	0.0850112	Home
10	0.1	0.0850112	Home
10	0.1	0.0850112	Home
10	0.09	0.0850112	Home
10	0.09	0.0850112	Home
10	0.12	0.0850112	Home
10	0.1	0.0850112	Home
10	0.11	0.087522	Home
10	0.17	0.0940459	Outdoor
10	0.17	0.0942066	Outdoor
10	0.03	0.0940675	Outdoor
10	0.09	0.0939467	Outdoor
10	0.08	0.0950826	Outdoor
10	0.07	0.0946495	Outdoor
10	0.07	0.093695	Outdoor
10	0.17	0.0940214	Outdoor
10	0.08	0.0940839	Outdoor
10	0.1	0.0940839	Outdoor
10	0.14	0.0887721	Other
10	0.1	0.0850112	Home
10	0.1	0.0850112	Home
10	0.07	0.0850112	Home
10	0.1	0.0850112	Home
10	0.06	0.0850112	Home
10	0.08	0.0850112	Home
10	0.09	0.0850112	Home
10	0.12	0.0850112	Home
10	0.07	0.0850112	Home
10	0.06	0.0850112	Home
10	0.11	0.0850112	Home
10	0.08	0.0850112	Home
10	0.09	0.0859639	Home
10	0.1	0.0940453	Outdoor
10	0.18	0.0939275	Outdoor
10	0.14	0.0941222	Outdoor
10	0.12	0.0926919	Outdoor
10	0.12	0.0935979	Outdoor
10	0.11	0.123763	Other
10	0.09	0.117241	Transport
10	0.17	0.0940265	Other
10	0.1	0.0903587	Other
10	0.08	0.0941457	Other
10	0.1	0.0904058	Other
10	0.1	0.0850112	Other
10	0.1	0.0850112	Other
10	0.12	0.0850112	Other
10	0.1	0.0850112	Other
10	0.11	0.0850112	Other
10	0.1	0.0850112	Other
10	0.11	0.0865198	Other
10	0.07	0.0939793	Outdoor
10	0.15	0.0895713	Outdoor
10	0.09	0.0923833	Outdoor
10	0.09	0.094507	Outdoor
10	0.07	0.0935326	Outdoor
10	0.07	0.0942017	Outdoor
10	0.1	0.0941405	Outdoor
10	0.04	0.0936077	Outdoor
10	0.12	0.0933094	Other
10	0.18	0.0946917	Outdoor
10	0.16	0.0929849	Outdoor
10	0.09	0.0862826	Indoor (except home)
11	0.08	0.107227	Home
11	0.07	0.101446	Outdoor
11	0.08	0.0882201	Outdoor
11	0.09	0.0871783	Outdoor
11	0.07	0.0953428	Outdoor
11	0.04	0.108359	Outdoor
11	0.08	0.10911	Home
11	0.1	0.100561	Outdoor
11	0.06	0.108765	Outdoor
11	0.03	0.108765	Outdoor
11	0.07	0.108765	Outdoor
11	0.07	0.108765	Outdoor
11	0.1	0.108765	Home
11	0.08	0.108765	Home
11	0.09	0.108765	Home
11	0.04	0.108765	Home
11	0.12	0.108765	Home
11	0.07	0.108765	Home
11	0.09	0.108765	Home
11	0.04	0.108765	Home
11	0.1	0.108765	Home
11	0.06	0.108765	Home
11	0.02	0.108765	Home
11	0.07	0.108765	Home
11	0.09	0.108765	Home
11	0.03	0.108765	Outdoor
11	0.1	0.108765	Outdoor
11	0.04	0.108765	Outdoor
11	0.06	0.108765	Outdoor
11	0.11	0.108765	Outdoor
11	0.02	0.108765	Home
11	0.11	0.108765	Home
11	0.06	0.108765	Outdoor
11	0.06	0.108765	Outdoor
11	0.04	0.108765	Outdoor
11	0.07	0.108765	Outdoor
11	0.11	0.108765	Home
11	0.04	0.108765	Home
11	0.06	0.108765	Home
11	0.11	0.108765	Home
11	0.07	0.108765	Home
11	0.07	0.108765	Home
11	0.06	0.108765	Home
11	0.09	0.108765	Home
11	0.09	0.108765	Home
11	0.12	0.108765	Home
11	0.09	0.108765	Home
11	0.07	0.108765	Home
11	0.08	0.108765	Home
11	0.11	0.108765	Outdoor
11	0.07	0.108765	Outdoor
11	0.04	0.108765	Outdoor
11	0.03	0.108765	Home
11	0.04	0.108765	Home
11	0.07	0.0910701	Home
11	0.09	0.0910543	Transport
11	0.07	0.109183	Indoor (except home)
11	0.1	0.109183	Indoor (except home)
11	0.08	0.10314	Other
11	0.1	0.0910543	Other
11	0.04	0.0850112	Indoor (except home)
11	0.12	0.0909496	Other
11	0.06	0.102826	Other
11	0.07	0.108765	Home
11	0.08	0.108765	Home
11	0.11	0.108765	Home
11	0.1	0.108765	Home
11	0.04	0.108765	Home
11	0.12	0.108765	Home
11	0.09	0.108765	Home
11	0.06	0.108765	Home
11	0.08	0.108765	Home
11	0.11	0.109183	Indoor (except home)
11	0.07	0.109183	Indoor (except home)
11	0.09	0.109183	Indoor (except home)
11	0.06	0.109183	Indoor (except home)
11	0.02	0.109183	Indoor (except home)
11	0.07	0.109183	Indoor (except home)
11	0.07	0.108974	Transport
11	0.04	0.108765	Home
11	0.09	0.108765	Outdoor
11	0.09	0.108765	Outdoor
11	0.16	0.108765	Outdoor
11	0.12	0.108765	Outdoor
11	0.1	0.108765	Outdoor
11	0.08	0.108765	Other
11	0.08	0.108765	Home
11	0.16	0.108765	Home
11	0.04	0.108765	Home
11	0.08	0.108765	Home
11	0.06	0.108765	Home
11	0.03	0.108765	Home
11	0.07	0.108765	Home
11	0.06	0.108765	Home
11	0.06	0.108765	Home
11	0.07	0.108765	Home
11	0.1	0.108765	Home
11	0.09	0.108765	Other
11	0.08	0.108765	Outdoor
11	0.09	0.108765	Outdoor
11	0.08	0.108765	Outdoor
11	0.06	0.108765	Outdoor
11	0.1	0.108765	Other
11	0.03	0.108765	Home
11	0.08	0.108765	Other
11	0.07	0.108765	Outdoor
11	0.11	0.108765	Outdoor
11	0.04	0.0958965	Other
11	0.04	0.0830284	Indoor (except home)
11	0.08	0.0830284	Indoor (except home)
11	0.06	0.0830284	Indoor (except home)
11	0.11	0.0830284	Indoor (except home)
11	0.06	0.096888	Home
11	0.01	0.108765	Home
11	0.08	0.108765	Home
11	0.1	0.108765	Home
11	0.07	0.108765	Home
11	0.04	0.108765	Home
11	0.06	0.108765	Home
11	0.07	0.108765	Home
11	0.1	0.108765	Home
11	0.04	0.108869	Other
11	0.06	0.109079	Other
11	0.1	0.109183	Indoor (except home)
11	0.02	0.109183	Indoor (except home)
11	0.09	0.109183	Indoor (except home)
11	0.07	0.109183	Indoor (except home)
11	0.09	0.109183	Indoor (except home)
11	0.08	0.109183	Indoor (except home)
11	0.09	0.109183	Indoor (except home)
11	0.11	0.109183	Indoor (except home)
11	0.09	0.108869	Other
11	0.06	0.108765	Home
11	0.06	0.108765	Home
11	0.08	0.108765	Home
11	0.03	0.108765	Home
11	0.09	0.108765	Home
11	0.13	0.108765	Home
11	0.03	0.108765	Home
11	0.08	0.108765	Home
11	0.07	0.108765	Home
11	0.07	0.108765	Home
11	0.1	0.108765	Home
11	0.06	0.108765	Home
11	0.07	0.108765	Home
11	0.06	0.108869	Other
11	0.06	0.109183	Indoor (except home)
11	0.11	0.109183	Indoor (except home)
11	0.1	0.109183	Indoor (except home)
11	0.11	0.109183	Indoor (except home)
11	0.11	0.109183	Indoor (except home)
11	0.09	0.109183	Indoor (except home)
11	0.08	0.109183	Indoor (except home)
11	0.08	0.109183	Indoor (except home)
11	0.1	0.109183	Indoor (except home)
11	0.04	0.108869	Other
11	0.11	0.108765	Home
11	0.11	0.108765	Home
11	0.06	0.108765	Home
11	0.08	0.108765	Home
11	0.12	0.108765	Home
11	0.1	0.108765	Home
11	0.03	0.108765	Home
11	0.12	0.108765	Home
11	0.13	0.108765	Home
11	0.04	0.108765	Home
11	0.09	0.108765	Home
11	0.1	0.108765	Home
11	0.02	0.108765	Home
11	0.03	0.108974	Transport
11	0.09	0.109183	Indoor (except home)
11	0.02	0.109183	Indoor (except home)
11	0.06	0.109183	Indoor (except home)
11	0.07	0.109183	Indoor (except home)
11	0.1	0.109183	Indoor (except home)
11	0.11	0.109183	Indoor (except home)
11	0.07	0.109183	Indoor (except home)
11	0.03	0.109183	Indoor (except home)
11	0.07	0.109183	Indoor (except home)
11	0.07	0.108869	Other
11	0.03	0.108765	Home
11	0.09	0.108765	Home
11	0.07	0.108765	Home
11	0.03	0.108765	Home
11	0.13	0.108765	Home
11	0.1	0.108765	Home
11	0.02	0.108765	Home
11	0.04	0.108765	Home
11	0.09	0.108765	Home
11	0.1	0.108765	Home
11	0.12	0.108765	Home
11	0.09	0.108765	Home
11	0.11	0.108765	Home
11	0.09	0.108869	Other
11	0.06	0.109183	Indoor (except home)
11	0.07	0.109183	Indoor (except home)
11	0.07	0.109183	Indoor (except home)
11	0.07	0.109183	Indoor (except home)
11	0.06	0.108625	Indoor (except home)
11	0.07	0.108712	Indoor (except home)
11	0.04	0.109745	Indoor (except home)
11	0.06	0.10848	Indoor (except home)
11	0.1	0.105603	Indoor (except home)
11	0.07	0.104839	Other
11	0.09	0.107456	Other
11	0.08	0.108765	Home
11	0.08	0.108765	Home
11	0.1	0.108765	Home
11	0.06	0.108765	Home
11	0.07	0.108765	Home
11	0.12	0.108765	Home
11	0.11	0.108765	Home
11	0.12	0.108765	Home
11	0.04	0.108765	Home
11	0.07	0.108765	Home
11	0.13	0.108765	Home
11	0.08	0.108765	Home
11	0.08	0.108974	Transport
11	0.09	0.109183	Indoor (except home)
11	0.01	0.109183	Indoor (except home)
11	0.07	0.109183	Indoor (except home)
11	0.08	0.109183	Indoor (except home)
11	0.08	0.109183	Indoor (except home)
11	0.03	0.109183	Indoor (except home)
11	0.08	0.0996389	Transport
11	0.1	0.103258	Outdoor
11	0.03	0.0885221	Outdoor
11	0.13	0.091555	Other
11	0.03	0.108765	Home
11	0.09	0.108765	Home
11	0.12	0.108765	Home
11	0.07	0.113059	Home
11	0.08	0.108765	Home
11	0.12	0.108765	Home
14	0.12	0.612584	Home
14	0.09	0.596632	Home
14	0.1	0.610407	Outdoor
14	0.1	0.58205	Outdoor
14	0.08	0.612585	Outdoor
14	0.05	0.612585	Outdoor
14	0.09	0.612584	Home
14	0.09	0.612585	Indoor (except home)
14	0.11	0.612585	Indoor (except home)
14	0.12	0.612585	Indoor (except home)
14	0.05	0.590353	Indoor (except home)
14	0.12	0.584254	Other
14	0.14	0.578632	Home
14	0.08	0.612584	Home
14	0.07	0.612584	Home
14	0.14	0.612584	Home
14	0.13	0.612584	Home
14	0.15	0.612584	Home
14	0.14	0.612584	Home
14	0.13	0.612584	Home
14	0.1	0.612584	Home
14	0.09	0.612584	Home
14	0.11	0.612584	Home
14	0.1	0.612584	Home
14	0.13	0.612584	Home
14	0.07	0.595314	Home
14	0.08	0.612585	Indoor (except home)
14	0.14	0.612585	Indoor (except home)
14	0.08	0.612585	Indoor (except home)
14	0.11	0.612585	Indoor (except home)
14	0.07	0.588566	Home
14	0.06	0.594529	Indoor (except home)
14	0.06	0.592023	Indoor (except home)
14	0.07	0.596417	Indoor (except home)
14	0.11	0.607393	Indoor (except home)
14	0.1	0.600915	Other
14	0.04	0.612584	Home
14	0.16	0.612584	Home
14	0.1	0.612584	Home
14	0.12	0.612584	Home
14	0.09	0.612584	Home
14	0.08	0.612584	Home
14	0.13	0.612584	Home
14	0.16	0.612584	Home
14	0.16	0.612584	Home
14	0.1	0.612584	Home
14	0.09	0.612584	Home
14	0.12	0.612584	Home
14	0.14	0.612584	Home
14	0.13	0.612584	Home
14	0.12	0.612585	Indoor (except home)
14	0.11	0.609354	Indoor (except home)
14	0.09	0.598513	Indoor (except home)
14	0.16	0.61027	Indoor (except home)
14	0.17	0.578071	Home
14	0.09	0.601167	Indoor (except home)
14	0.15	0.612585	Indoor (except home)
14	0.08	0.612585	Indoor (except home)
14	0.06	0.60943	Indoor (except home)
14	0.2	0.567879	Other
14	0.08	0.612584	Home
14	0.15	0.612584	Home
14	0.07	0.612584	Home
14	0.08	0.612584	Home
14	0.09	0.612584	Home
14	0.1	0.612584	Home
14	0.14	0.612584	Home
14	0.16	0.612584	Home
14	0.1	0.612584	Home
14	0.07	0.612584	Home
14	0.11	0.612584	Home
14	0.13	0.612584	Home
14	0.1	0.612584	Home
14	0.11	0.612584	Home
14	0.14	0.570707	Indoor (except home)
14	0.09	0.589134	Indoor (except home)
14	0.1	0.604119	Indoor (except home)
14	0.09	0.612585	Indoor (except home)
14	0.09	0.588668	Home
14	0.08	0.612585	Indoor (except home)
14	0.15	0.612585	Indoor (except home)
14	0.1	0.612585	Indoor (except home)
14	0.13	0.612585	Indoor (except home)
14	0.08	0.612584	Home
14	0.11	0.612584	Home
14	0.08	0.612584	Home
14	0.09	0.612584	Home
14	0.11	0.612584	Home
14	0.13	0.612584	Home
14	0.08	0.612584	Home
14	0.11	0.612584	Home
14	0.13	0.612584	Home
14	0.11	0.612584	Home
14	0.05	0.612584	Home
14	0.09	0.612584	Home
14	0.07	0.612584	Home
14	0.06	0.612584	Home
14	0.09	0.612584	Home
14	0.1	0.612584	Home
14	0.07	0.612584	Home
14	0.12	0.612584	Home
14	0.1	0.612584	Home
14	0.08	0.612584	Home
14	0.13	0.612584	Home
14	0.1	0.4588	Indoor (except home)
14	0.15	0.4588	Indoor (except home)
14	0.11	0.535692	Transport
14	0.06	0.612584	Home
14	0.11	0.612584	Home
14	0.1	0.612584	Home
14	0.07	0.612584	Home
14	0.1	0.612584	Home
14	0.16	0.612584	Home
14	0.08	0.612584	Home
14	0.16	0.612584	Home
14	0.1	0.612584	Home
14	0.09	0.612584	Home
14	0.12	0.612584	Home
14	0.1	0.612584	Home
14	0.12	0.612584	Home
14	0.02	0.610147	Transport
14	0.1	0.629734	Home
14	0.21	0.639346	Other
14	0.14	0.476143	Transport
14	0.09	0.377025	Indoor (except home)
14	0.16	0.605787	Other
14	0.13	0.649321	Other
14	0.19	0.601179	Home
14	0.12	0.612584	Home
14	0.19	0.612584	Home
14	0.16	0.601179	Home
14	0.13	0.612584	Home
14	0.09	0.612584	Home
14	0.16	0.612584	Home
14	0.11	0.612584	Home
14	0.12	0.612584	Home
14	0.09	0.612584	Home
14	0.12	0.612584	Home
14	0.11	0.612584	Home
14	0.06	0.57387	Home
14	0.09	0.619167	Home
14	0.11	0.597555	Indoor (except home)
14	0.04	0.590733	Indoor (except home)
14	0.08	0.596772	Indoor (except home)
14	0.16	0.596178	Indoor (except home)
14	0.13	0.57406	Home
14	0.09	0.612585	Indoor (except home)
14	0.13	0.612585	Indoor (except home)
14	0.14	0.494072	Outdoor
14	0.13	0.494947	Outdoor
14	0.13	0.541766	Other
14	0.13	0.601179	Home
14	0.15	0.612584	Home
14	0.12	0.612584	Home
14	0.09	0.612584	Home
14	0.13	0.612584	Home
14	0.07	0.612584	Home
14	0.18	0.612584	Home
14	0.09	0.612584	Home
14	0.1	0.612584	Home
14	0.13	0.612584	Home
14	0.16	0.612584	Home
14	0.11	0.612584	Home
14	0.11	0.612584	Home
14	0.09	0.604395	Home
14	0.05	0.602077	Other
14	0.06	0.612573	Indoor (except home)
14	0.16	0.586409	Indoor (except home)
14	0.11	0.58667	Indoor (except home)
14	0.22	0.579299	Home
14	0.16	0.585168	Home
14	0.19	0.554776	Other
14	0.12	0.547683	Other
14	0.14	0.593772	Other
14	0.11	0.501116	Transport
14	0.09	0.3896	Transport
14	0.14	0.648785	Home
14	0.09	0.612584	Home
14	0.13	0.612584	Home
14	0.12	0.612584	Home
14	0.14	0.612584	Home
14	0.08	0.612584	Home
14	0.11	0.612584	Home
14	0.06	0.612584	Home
14	0.08	0.612584	Home
14	0.05	0.612584	Home
14	0.1	0.594805	Home
14	0.15	0.612584	Home
14	0.16	0.585328	Home
14	0.19	0.55182	Home
14	0.18	0.564121	Outdoor
14	0.17	0.558828	Outdoor
14	0.19	0.585055	Outdoor
14	0.19	0.585019	Home
14	0.08	0.589909	Home
14	0.11	0.597195	Home
14	0.13	0.588653	Home
14	0.12	0.589506	Home
14	0.03	0.588956	Home
14	0.08	0.579773	Home
14	0.15	0.599685	Home
14	0.14	0.600958	Home
14	0.16	0.612584	Home
14	0.04	0.612584	Home
14	0.14	0.612584	Home
15	0.29	1.19873	Home
15	0.42	1.19873	Home
15	0.34	1.18773	Home
15	0.36	1.19873	Home
15	0.26	1.18801	Home
15	0.27	0.972051	Other
15	0.17	0.849735	Other
15	0.16	1.16167	Other
15	0.2	1.19873	Home
15	0.25	0.867178	Transport
15	0.2	0.501408	Transport
15	0.11	0.383444	Indoor (except home)
15	0.05	0.381716	Indoor (except home)
15	0.06	0.382439	Indoor (except home)
15	0.16	0.383245	Indoor (except home)
15	0.25	0.562651	Transport
15	0.45	1.17709	Other
15	0.3	1.19873	Home
15	0.36	1.19873	Home
15	0.18	1.19873	Home
15	0.24	1.19873	Home
15	0.21	1.19873	Home
15	0.32	1.19873	Home
15	0.34	1.19873	Home
15	0.31	1.19873	Home
15	0.35	1.19873	Home
15	0.37	1.19873	Home
15	0.39	1.19873	Home
15	0.39	1.19873	Home
15	0.38	1.18773	Home
15	0.23	1.19873	Home
15	0.43	1.18545	Home
15	0.64	1.14285	Other
15	0.92	1.18553	Outdoor
15	0.29	1.18204	Other
15	0.33	1.19873	Home
15	0.36	1.19873	Home
15	0.3	1.19323	Home
15	0.27	1.19873	Home
15	0.35	1.19873	Home
15	0.36	1.18915	Home
15	0.34	1.19323	Home
15	0.22	1.19323	Home
15	0.29	1.19323	Home
15	0.27	1.19873	Home
15	0.31	1.19873	Home
15	0.36	1.19873	Home
15	0.31	1.19873	Home
15	0.25	0.379041	Other
15	0.31	0.580536	Other
15	0.32	0.983526	Other
15	0.39	1.18677	Home
15	0.72	1.19276	Home
15	1.28	1.18581	Other
15	0.37	1.19323	Home
15	0.32	1.19317	Home
15	0.41	1.19873	Home
15	0.33	1.1875	Home
15	0.42	1.18773	Home
15	0.27	1.19873	Home
15	0.37	1.19873	Home
15	0.35	1.19873	Home
15	0.38	1.19873	Home
15	0.26	1.19873	Home
15	0.27	1.19873	Home
15	0.41	1.19873	Home
15	0.37	1.19873	Home
15	0.35	1.19873	Home
15	0.23	1.18614	Home
15	0.46	1.19327	Home
15	0.35	1.19209	Home
15	0.29	0.615263	Home
15	0.23	0.605286	Home
15	0.25	1.19358	Home
15	0.26	1.19127	Other
15	0.17	1.19323	Outdoor
15	0.19	1.18705	Other
15	0.16	0.95	Outdoor
15	0.39	1.1924	Home
15	0.26	1.19316	Home
15	0.2	1.18759	Home
15	0.27	1.19323	Home
15	0.28	1.19873	Home
15	0.29	1.19873	Home
15	0.23	1.19873	Home
15	0.29	1.19873	Home
15	0.31	1.19873	Home
15	0.23	1.19873	Home
15	0.26	1.19873	Home
15	0.27	1.19873	Home
15	0.24	1.19873	Home
15	0.27	1.19323	Home
15	0.31	1.19873	Home
15	0.19	1.19873	Home
15	0.3	1.19305	Home
15	0.23	1.18271	Home
15	0.24	1.19873	Home
15	0.26	1.19323	Home
15	0.29	1.19873	Home
15	0.25	1.19873	Home
[truncated: 26,037 more rows]
